# Supplementary material
Source: Springer Nature journal article supplement (https://www.springermedizin.de/resource/supplementary/12963_2010_107_MOESM2_ESM.pdf/9572674)

### MSE of CSMF estimates

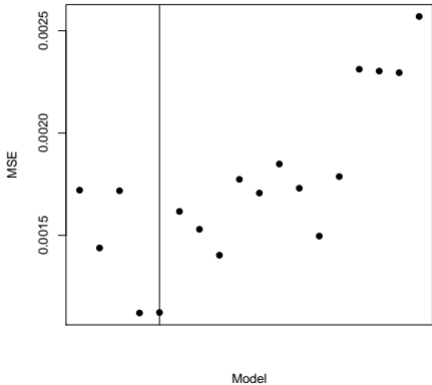

Supplement: MOESM2 [file 9572674]
